# Supplementary material for: Etiologies, Clinical Features, and Outcome of Oxalate Nephropathy
Source: PubMed Central journal article supplement — Kidney Int Rep. 2020 Jul 2;5(9):1503–9. doi: 10.1016/j.ekir.2020.06.021 (PMC7486173; doi:10.1016/j.ekir.2020.06.021), 2020-07-02
Supplement: mmc1.pdf [file mmc1.pdf]

**Supplementary Table S1. Details of kidney biopsies with at least 1 oxalate crystal.**

| Age at biopsy (years)                                       | Gender* | Number of oxalate crystals | Number of glomeruli | Oxalate crystals /glomeruli ratio | Kidney disease                     |
|-------------------------------------------------------------|---------|----------------------------|---------------------|-----------------------------------|------------------------------------|
| 75                                                          | M       | 1                          | 33                  | 0,03                              | Terminal diabetic nephropathy      |
| 68                                                          | M       | 1                          | 25                  | 0,04                              | Sepsis-associated AKI              |
| 57                                                          | M       | 2                          | 31                  | 0,06                              | Terminal diabetic nephropathy      |
| 64                                                          | M       | 1                          | 14                  | 0,07                              | Sarcoidosis-associated AIN         |
| 67                                                          | M       | 1                          | 13                  | 0,08                              | ANCA-associated vasculitis         |
| 72                                                          | M       | 2                          | 19                  | 0,11                              | Ciprofloxacin-associated AIN**     |
| 70                                                          | F       | 2                          | 19                  | 0,11                              | Omeprazole-associated AIN**        |
| 42                                                          | M       | 1                          | 9                   | 0,11                              | Active IgA nephropathy             |
| 47                                                          | F       | 4                          | 35                  | 0,11                              | Hantaan nephropathy                |
| 48                                                          | M       | 1                          | 8                   | 0,13                              | Active IgA nephropathy             |
| 83                                                          | M       | 2                          | 13                  | 0,15                              | Sepsis-associated AKI              |
| <b>Oxalate crystals/glomeruli ratio in cases of non-OxN</b> |         |                            |                     | <b>0,09±0,00</b>                  |                                    |
| 42                                                          | F       | 3                          | 12                  | 0,25                              | OxN / chronic pancreatitis         |
| 79                                                          | M       | 6                          | 20                  | 0,30                              | OxN / chronic pancreatitis         |
| 61                                                          | M       | 7                          | 21                  | 0,33                              | OxN / undetermined cause           |
| 46                                                          | M       | 6                          | 11                  | 0,55                              | OxN / chronic pancreatitis         |
| 80                                                          | M       | 14                         | 24                  | 0,58                              | OxN / chronic pancreatitis         |
| 42                                                          | F       | 22                         | 26                  | 0,85                              | OxN /gastric bypass                |
| 59                                                          | M       | 8                          | 9                   | 0,89                              | OxN / undetermined cause           |
| 68                                                          | M       | 10                         | 10                  | 1,00                              | OxN / pancreatectomy               |
| 70                                                          | M       | 7                          | 6                   | 1,17                              | OxN / Lenalidomide use             |
| 66                                                          | F       | 31                         | 17                  | 1,82                              | OxN / Orlistat use                 |
| 59                                                          | M       | 35                         | 19                  | 1,84                              | OxN /gastric bypass                |
| 70                                                          | M       | 32                         | 16                  | 2,00                              | OxN /gastric bypass                |
| 48                                                          | F       | 62                         | 29                  | 2,14                              | OxN / undetermined cause           |
| 76                                                          | F       | 20                         | 8                   | 2,50                              | OxN /gastric bypass                |
| 80                                                          | M       | 5                          | 2                   | 2,50                              | OxN / Orlistat use                 |
| 33                                                          | M       | 64                         | 21                  | 3,05                              | OxN / ethylene glycol intoxication |
| 73                                                          | M       | 21                         | 6                   | 3,50                              | OxN / excessive vitamin C intake   |
| 86                                                          | F       | 61                         | 17                  | 3,59                              | OxN /gastric bypass                |
| 55                                                          | M       | 60                         | 15                  | 4,00                              | OxN / chronic pancreatitis         |
| 33                                                          | M       | 105                        | 17                  | 6,18                              | OxN / ethylene glycol intoxication |
| 64                                                          | F       | 10                         | 1                   | 10,00                             | OxN / intestinal resection         |
| <b>Oxalate crystals/glomeruli ratio in cases of OxN</b>     |         |                            |                     | <b>2,33±2,31</b>                  |                                    |

AKI, Acute kidney injury; AIN, Acute interstitial nephritis; OxN, Oxalate nephropathy; \*M=male, F=Female; \*\*Patients received short term steroids with recovery of kidney function.
